# Supplementary material
Source: PubMed Central journal article supplement (PMC9789402)
Supplement: joces-135-260110-s1.pdf [file joces-135-260110-s1.pdf]

(A)

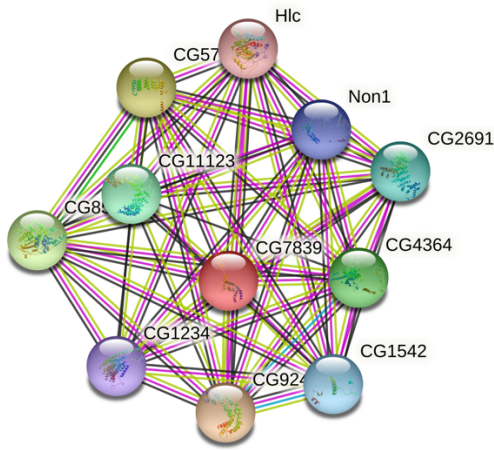

(B)

| Your Input:                    |                                                                                                                                                                                                           | Neighborhood | Gene Fusion | Cooccurrence | Coexpression | Experiments | Databases | Textmining | [Homology] | Score |
|--------------------------------|-----------------------------------------------------------------------------------------------------------------------------------------------------------------------------------------------------------|--------------|-------------|--------------|--------------|-------------|-----------|------------|------------|-------|
| ● CG7839                       | <i>IP14658p; Sequence-specific DNA binding transcription factor activity. It is involved in the biological process described with: regulation of transcription, DNA-templated; neurogenesis (1174 aa)</i> |              |             |              |              |             |           |            |            |       |
| Predicted Functional Partners: |                                                                                                                                                                                                           |              |             |              |              |             |           |            |            |       |
| ● CG9246                       | <i>Nucleolar complex protein 2 homolog; It is involved in the biological process described with: neurogenesis</i>                                                                                         |              |             | ●            | ●            |             |           | ●          |            | 0.997 |
| ● CG5728                       | <i>LD41803p; mRNA binding. It is involved in the biological process described with: regulation of alternative mRNA splicing, via ...</i>                                                                  |              |             | ●            | ●            |             |           | ●          |            | 0.995 |
| ● CG8545                       | <i>LD11307p; RNA binding; S-adenosylmethionine-dependent methyltransferase activity. It is involved in the biological process d...</i>                                                                    |              |             | ●            | ●            |             |           | ●          |            | 0.995 |
| ● CG4364                       | <i>Pescadillo homolog; Required for maturation of ribosomal RNAs and formation of the large ribosomal subunit</i>                                                                                         |              |             | ●            | ●            |             |           | ●          |            | 0.988 |
| ● CG11123                      | <i>RH42110p; RNA binding</i>                                                                                                                                                                              |              |             | ●            | ●            |             |           | ●          |            | 0.984 |
| ● CG2691                       | <i>RRP12-like protein; It is involved in the biological process described with: neuron projection morphogenesis</i>                                                                                       |              |             | ●            | ●            |             |           | ●          |            | 0.982 |
| ● CG1542                       | <i>Probable rRNA-processing protein EBP2 homolog; Required for the processing of the 27S pre-rRNA</i>                                                                                                     |              |             | ●            | ●            |             |           | ●          |            | 0.982 |
| ● Non1                         | <i>Nucleolar GTP-binding protein 1; Involved in the biogenesis of the 60S ribosomal subunit (By similarity). Required for normal ...</i>                                                                  |              |             | ●            | ●            |             |           | ●          |            | 0.982 |
| ● CG1234                       | <i>annotation not available</i>                                                                                                                                                                           |              |             | ●            | ●            |             |           | ●          |            | 0.981 |
| ● Hlc                          | <i>Helicase, isoform A; ATP binding; ATP-dependent RNA helicase activity; nucleic acid binding. It is involved in the biological pr...</i>                                                                |              |             | ●            | ●            |             |           | ●          |            | 0.979 |

**Fig. S1. Protein-protein interaction network generated using STRING (Szklarczyk et al., 2019)**

(A) Graphic representation and (B) predicted list of the functional partners of NOC1/CG7839, members of the interaction network.

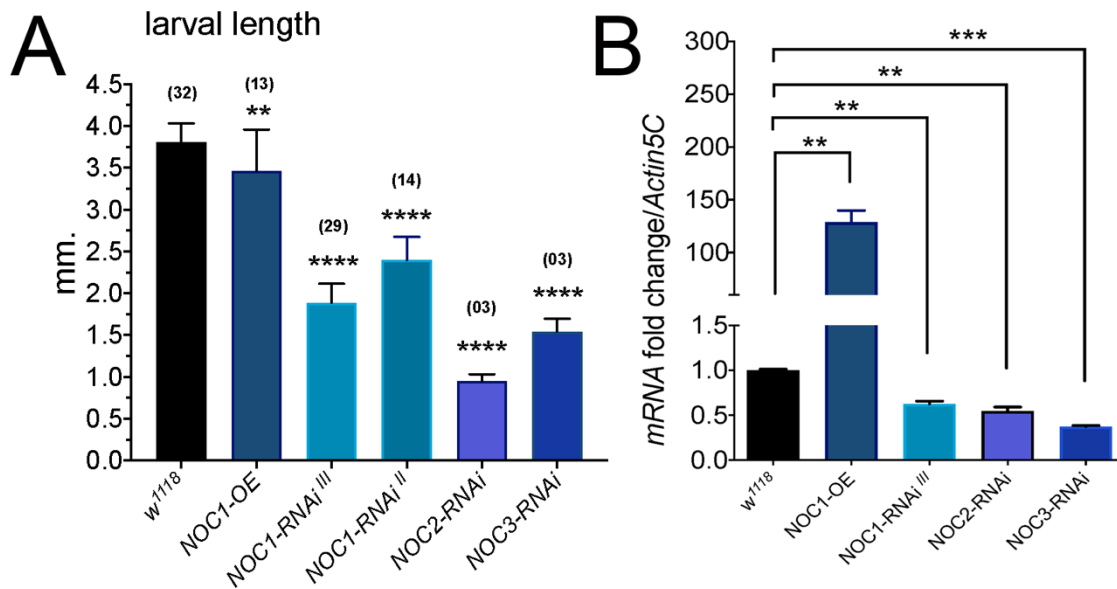

**Fig. S2A-B.** Length of larvae (A) and the relative mRNA expression (B) in whole larvae overexpressing *NOC1* or with downregulation of *NOC1*, 2 and 3 using the *actin-Gal4* promoter.

(A) Larval Length was measured at 120 hours AEL. The asterisks represent the *p*-values from one-way analysis of variance (ANOVA) with Tukey multiple comparisons \*\* = *p* < 0.01 and \*\*\*\* = *p* < 0.0001, and the error bars indicate the standard deviations for each genotype. In parenthesis is indicated the number of animals analyzed. (B) qRT-PCR showing the relative amount of *NOCs* mRNA upon RNA overexpression or interference. *NOC1-OE* and *NOCs-RNAi* were ubiquitously expressed using the *actin-Gal4* promoter. RNA was extracted from whole larvae. *p*-values were calculated from Student's *t*-test from at least two independent experiments: \*\* = *p* < 0.01, \*\*\* = *p* < 0.001 and \*\*\*\* = *p* < 0.0001, the error bars indicate the standard deviations.

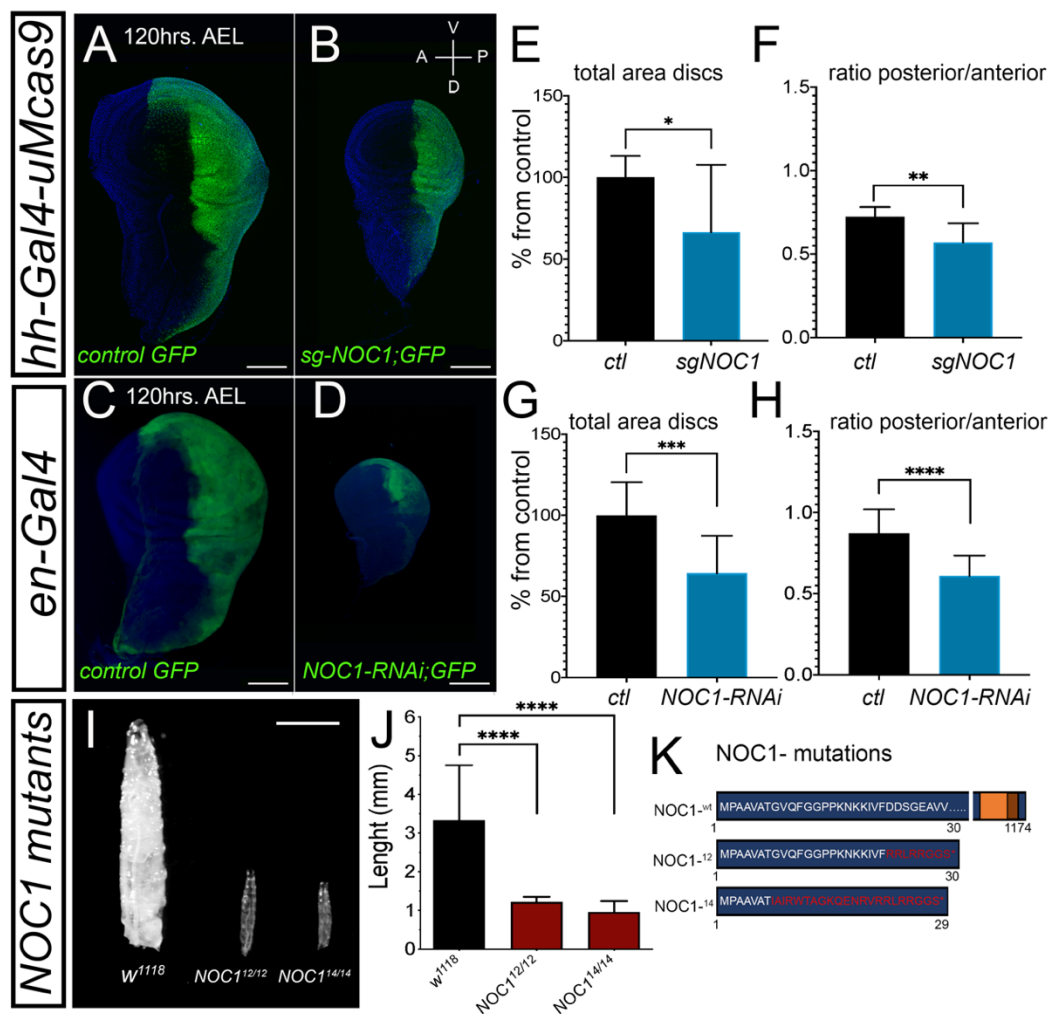

**Fig. S3. NOC1 CRISPR mutation affects animal growth and phenocopies NOC1 downregulation induced by RNA interference in the wing disc.**

To develop genomic *NOC1* mutants, we induced site specific mutations with the CRISPR-Cas9 system, using the line *sgRNA*<sup>CG7839</sup> from Boutros's laboratory (Port et al., 2020). To analyze if the reduction of *NOC1* with this system phenocopied the data with *engrailed-Gal4*, we used a line that carries the *hedgehog-Gal4* to drive *UAS-Cas9* to express *sgRNA*<sup>CG7839</sup> in the posterior compartment of the wing disc. As shown in Figure A-B, driving mutations of *NOC1* using *hedgehog-Gal4* compromised and reduced the development of the posterior compartment of the wing disc within a similar extent to that observed with *engrailed-NOC1-RNAi* (C-D). To compare the efficiency of the two systems, we analyzed the total area of imaginal discs and the ratio between the area of the posterior compartment (marked by co-expression of GFP) and the anterior from animals at 120 hours AEL. This analysis showed that reduction of *NOC1* using *sgRNA*<sup>CG7839</sup> affected the total area of the discs and the ratio between the posterior and the anterior compartments (E-F). These data resembled that obtained using *NOC1-RNAi* expressed under the *engrailed* promoter (G-H). To introduce *NOC1* mutations in the germ line, we used the *nos-Gal4*, *UAS-Cas9* line crossed with *sgRNA*<sup>CG7839</sup>. Sequencing analysis of 30 *NOC1* heterozygous lines revealed the presence of missense mutations in the *NOC1* gene in two lines, which encoded for very short polypeptides of 30 and 29 amino acids in length in *NOC1-mut12* and *NOC1-mut14*, respectively (K). Moreover, the phenotypic analysis of these two homozygous *NOC1* mutants showed a robust growth defect at the larval stage (I and J, also shown in Figure 1C), recapitulating the phenotype described in the *actin-NOC1-RNAi* larvae (Figure 1B).

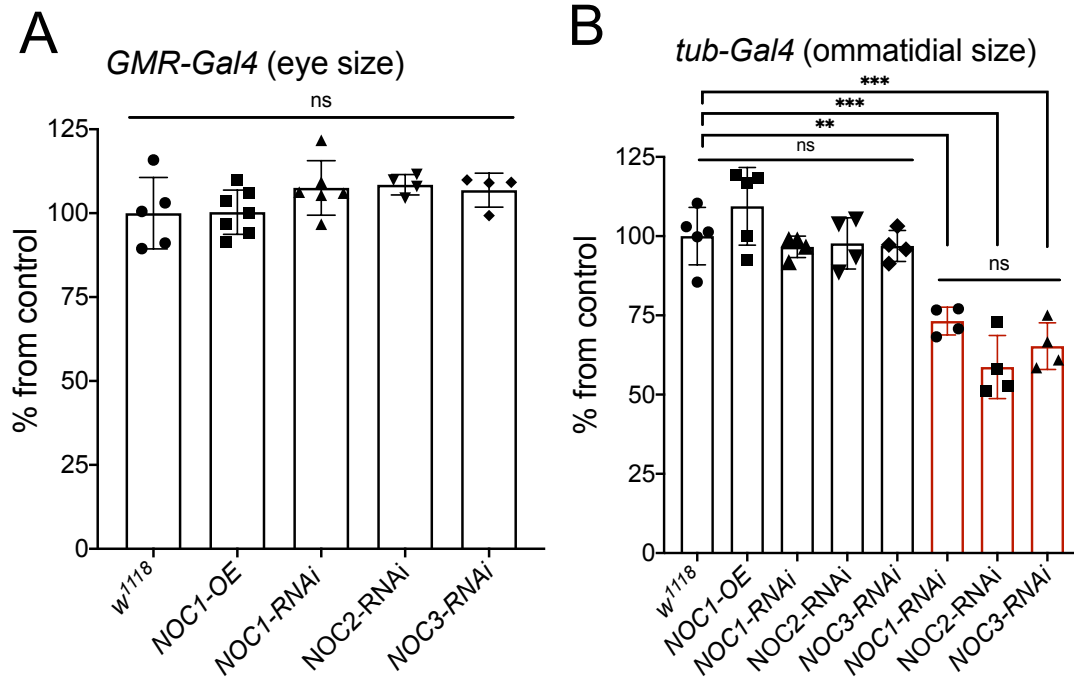

**Fig. S4.** (A) Quantification of the eye size from animals expressing the indicated transgenes using the *GMR-Gal4* promoter, (B) or the ommatidial size using the *tubulin-Gal4* promoter. Values are expressed as % from the control. Statistical analysis was calculated using Student's *t*-test from the number of animals indicated in the experiment. The error bars indicate the standard deviations.

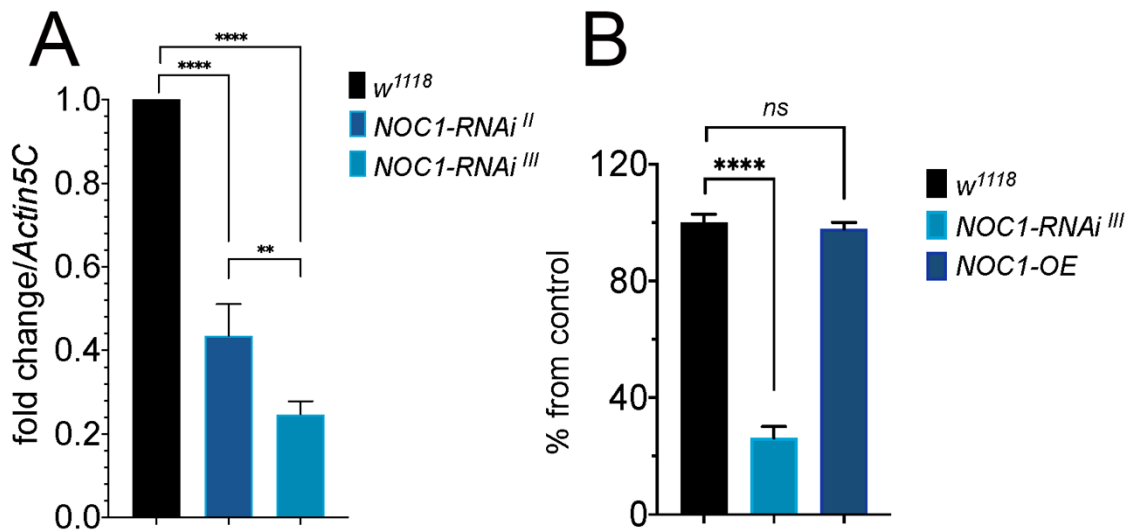

**Fig. S5 A-B.** (A) qRT-PCR showing the relative amount of *NOC1* mRNA upon expression of the indicated transgenes using the ubiquitous *actin-Gal4* promoter. RNA was extracted from whole larvae. *p*-values were calculated from Student's *t*-test from at least two independent experiments: \*\* =  $p < 0.01$ , \*\*\*\* =  $p < 0.0001$ , the error bars indicate the standard deviations. (B) Analysis of the size of wings in adult females of the indicated genotypes. *p*-values were calculated from Student's *t*-test from at least two independent experiments: \* =  $p < 0.05$ , \*\* =  $p < 0.01$ , \*\*\*\* =  $p < 0.0001$ , the error bars indicate the standard deviations. At least 10 animals were used for w<sup>1118</sup> and NOC1-OE, while for NOC1-RNAi<sup>III</sup> only 4 were born as adults (escapers).

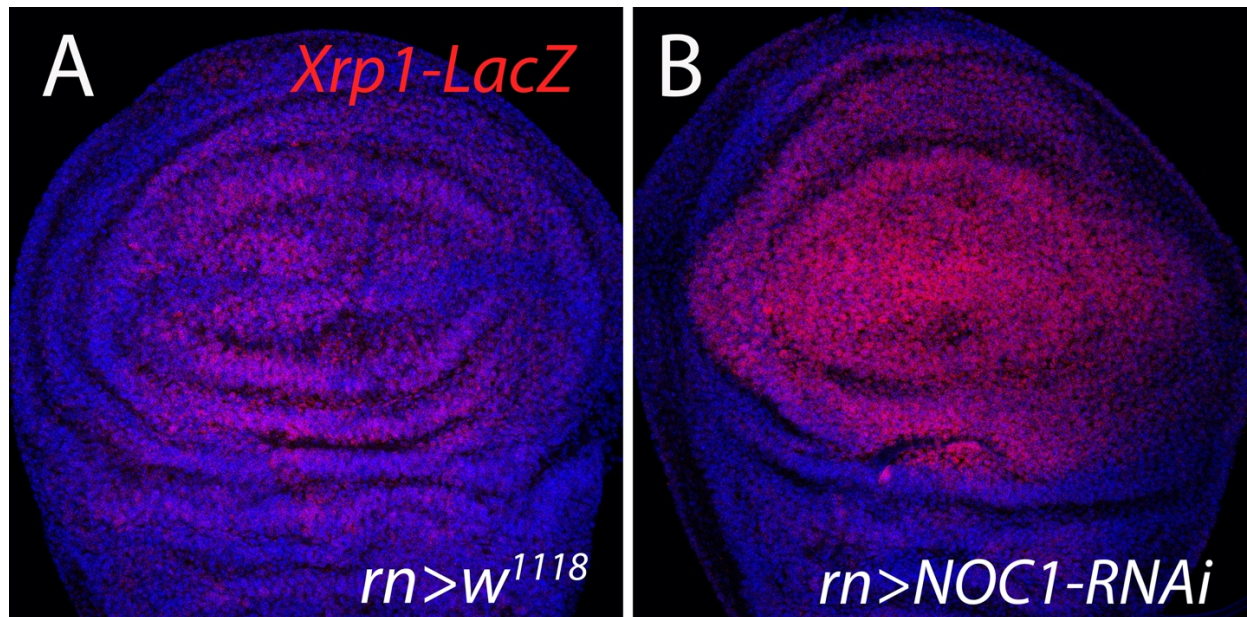

**Fig. S6. Confocal images of wing imaginal discs showing increased activation of Xrp1 promoter upon expression of NOC1-RNAi using the *rotund-Gal4* promoter.** *NOC1-RNAi* was expressed using the *rn-Gal4* promoter in a line carrying the *Xrp1*<sup>02515</sup>-lacZ as a reporter for the activation of XRP1 (Baillon et al., 2018). Third instar imaginal discs were dissected and analyzed for LacZ expression using anti-beta gal antibody (red). Nuclei were stained with Hoechst (blue). *w*<sup>1118</sup>*Xrp1*<sup>02515</sup> was used as control.

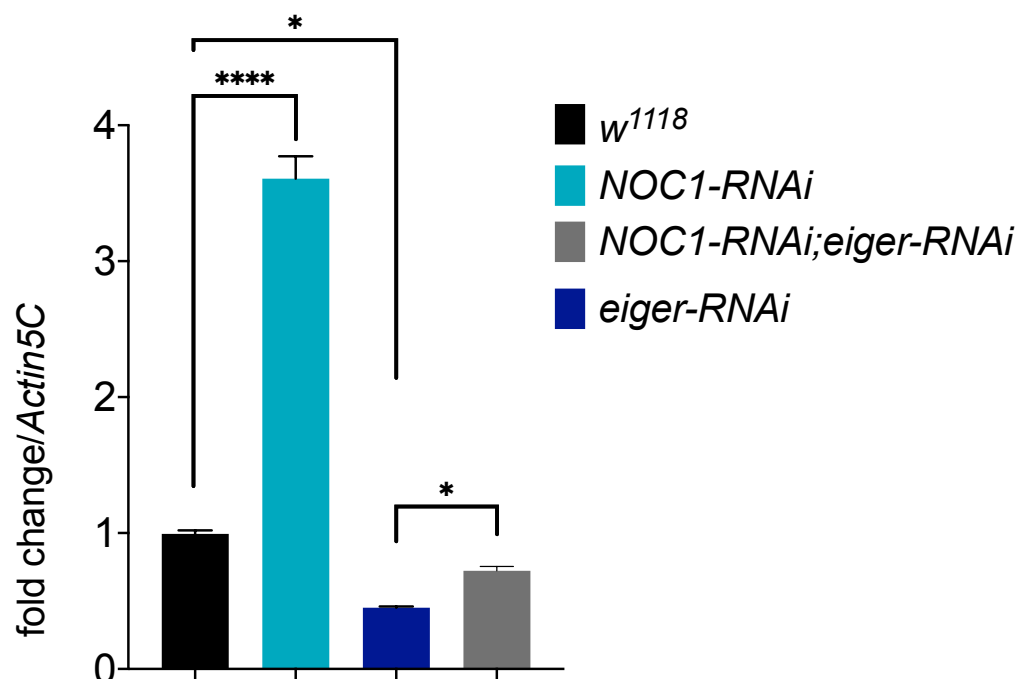

**Fig. S7. qRT-PCR showing the relative amount of *eiger*-mRNA in wing imaginal discs from animals of the indicated genotypes. *NOC1-RNAi* or in combination with *eiger-RNAi* were expressed using the *nubbin-Gal4* promoter. RNA was extracted from imaginal discs. *p*-values were calculated with One-way ANOVA \* = *p* < 0.05, \*\*\*\* = *p* < 0.0001, the error bars indicate the standard deviations.**

**Table S1. Selected list of potential targets of CEBPz involved in ribosomal biogenesis and nucleolar control.** Data are from TCGA datasets from cBio Cancer Genomic Portal from Liver Hepatocellular Carcinoma (A) and Breast Cancer (B). \*common proteins

| <b>A</b> | <b>liver tumor</b> | <b>p Value</b> | <b>B</b> | <b>brast tumor</b> | <b>p Value</b> |
|----------|--------------------|----------------|----------|--------------------|----------------|
|          | DKC1/NOP60b        | 6.71E-15       |          | <b>NOP2*</b>       | 0.0454         |
|          | FBL                | 0.000001171    |          | <b>RPS7*</b>       | 3.36E-04       |
|          | NOP10              | 0.00007354     |          | RPS8               | 0.0325         |
|          | NOP16              | 0.000008451    |          | RPL5               | 0.0444         |
|          | <b>NOP2*</b>       | 1.59E-10       |          | RPL12              | 0.0225         |
|          | NOP56              | 0.000001243    |          | RPL14              | 0.0389         |
|          | NOP58              | 5.18E-14       |          | <b>RPL24*</b>      | 0.0333         |
|          | <b>RPS7*</b>       | 5.54E-12       |          | RPL27              | 0.032          |
|          | RPS16              | 0.0008972      |          | RPL32              | 0.047          |
|          | RPS18              | 0.005751       |          | RPL35              | 0.044          |
|          | RPS20              | 0.0000206      |          | <b>RPL35A*</b>     | 0.0419         |
|          | RPS21              | 0.0007177      |          |                    |                |
|          | RPS27A             | 1.23E-08       |          |                    |                |
|          | RPS2P32            | 0.0000032      |          |                    |                |
|          | RPSA               | 0.004546       |          |                    |                |
|          | RPL5               | 0.0005937      |          |                    |                |
|          | RPL7               | 0.0191         |          |                    |                |
|          | RPL21              | 0.0005989      |          |                    |                |
|          | RPL24*             | 0.00188        |          |                    |                |
|          | RPL30              | 0.00006775     |          |                    |                |
|          | <b>RPL35A*</b>     | 0.0001787      |          |                    |                |
|          | RPL38              | 0.0008094      |          |                    |                |
|          | RPL39              | 0.00004626     |          |                    |                |



**Table S2. List of PRIMERS used for qRT-PCRs**

| gene                    | 5' FW sequence                | 5' REV sequence            | reference                |
|-------------------------|-------------------------------|----------------------------|--------------------------|
| <i>NOC1</i>             | CTATACGCTCCACCGCACAT          | GTCGCTACCGAACTTGTCC<br>A   | this work                |
| <i>NOC2</i>             | AGGAGCTTGAAGGGCTTAAAG<br>A    | ATCCTTGCTGGGTTTGTGG<br>TA  | this work                |
| <i>NOC3</i>             | TGCAGGCAGGCAAAAATCAC          | AGCAAGCGTTTCATGAAGG<br>C   | this work                |
| <i>E74b</i>             | GAATCCGTAGCCTCCGACTGT         | AGGAGGGAGAGTGGTGGT<br>GTT  | (Colombani et al., 2005) |
| <i>Actin5c</i>          | CAGATCATGTTTCGAGACCTTCA<br>AC | ACGACCGGAGGCGTACAG         | (Colombani et al., 2005) |
| <i>Dilp8</i>            | CGACAGAAG GTCCATCGAGT         | GTT TTGCCG GATCCAAGTC      | (Boulan et al., 2019)    |
| <i>NOC1<br/>genomic</i> | GTCACGGTCATTTCAATGGTA         | CATGTCCAGCACCTCATC         | this work                |
| <i>ITS1</i>             | GAAGAAACAAAATTCGAAAG          | CGTATGCCCATAACTAAGAT       | Neumuller et al., 2013)  |
| <i>ITS2</i>             | ATCTTAGTTATGGGCATACG          | CTGGCATATATCAATTCCTT       | (Neumuller et al., 2013) |
| <i>18S</i>              | CTCATATCCGAGGCCCTGTA          | ACGAACGTTTTAACCGCAA<br>C   | (Neumuller et al., 2013) |
| <i>28S</i>              | CGCTACGTCCGTTGGATTAT          | CAATGCAAATTGCCCTTAT        | (Neumuller et al., 2013) |
| <i>XRP1</i>             | GACCACACCGGAGATTATCAA         | GCTGGTACTGGTACTTGTG<br>GTG | (Baillon et al., 2018)   |
| <i>Eiger</i>            | AAAGGTGGATGGCCTCACG           | TGCCGGTATGTGCATTGTT<br>G   | this work                |

**Baillon, L., Germani, F., Rockel, C., Hilchenbach, J. and Basler, K. (2018).** Xrp1 is a transcription factor required for cell competition-driven elimination of loser cells. *Sci Rep* **8**, 17712.

**Boulan, L., Andersen, D., Colombani, J., Boone, E. and Leopold, P. (2019).** Inter-Organ Growth Coordination Is Mediated by the Xrp1-Dilp8 Axis in Drosophila. *Dev Cell* **49**, 811-818 e4.

**Colombani, J., Bianchini, L., Layalle, S., Pondeville, E., Dauphin-Villemant, C., Antoniewski, C., Carre, C., Noselli, S. and Leopold, P. (2005).** Antagonistic actions of ecdysone and insulins determine final size in Drosophila. *Science* **310**, 667-70.

**Neumuller, R. A., Gross, T., Samsonova, A. A., Vinayagam, A., Buckner, M., Founk, K., Hu, Y., Sharifpoor, S., Rosebrock, A. P., Andrews, B. et al. (2013).** Conserved regulators of nucleolar size revealed by global phenotypic analyses. *Sci Signal* **6**, ra70.

**Port, F., Strein, C., Stricker, M., Rauscher, B., Heigwer, F., Zhou, J., Beyersdorffer, C., Frei, J., Hess, A., Kern, K. et al. (2020).** A large-scale resource for tissue-specific CRISPR mutagenesis in Drosophila. *Elife* **9**.

**Szklarczyk, D., Gable, A. L., Lyon, D., Junge, A., Wyder, S., Huerta-Cepas, J., Simonovic, M., Doncheva, N. T., Morris, J. H., Bork, P. et al. (2019).** STRING v11: protein-protein association networks with increased coverage, supporting functional discovery in genome-wide experimental datasets. *Nucleic Acids Res* **47**, D607-D613.
